# Supplementary material for: Inhibition underlies fast undulatory locomotion in C. elegans
Source: bioRxiv preprint, doi:10.1101/2020.06.10.138578, version 2 (2020-08-16)
Supplement: Supplemental table 2-3 [file 138578_file18.docx]

**Table 2-3.** GABAergic mutant strains move at lower speed and frequency than wild-type 5 seconds post-stimulus.

Five seconds after a harsh touch to the head or tail all GABAergic knockout animals moved with lower translocation speed and undulation frequency than wild type. Calculated probabilities for null hypotheses (p-value) below 0.05 were considered significant and are in red.

|  |  | **Translocation Speed (µm/s)*** | | | **Undulation Frequency (Hz)** | | |
| --- | --- | --- | --- | --- | --- | --- | --- |
|  |  | **Mean±SD** | **One-way ANOVA** | **p value (Tukey test)** | **Mean±SD** | **One-way ANOVA** | **p value (Tukey test)** |
| **Head Stimulation** | **Wild Type** | 345±51 | F(3,35)=67.78, p< 0.0001 | Comparison Reference | 0.45±0.06 | F(3,35)=13.70, p< 0.0001 | Comparison Reference |
| ***unc-25*** | 76±48 | < 0.0001 | 0.26±0.07 | 0.0004 |
| ***unc-46*** | 54±95 | < 0.0001 | 0.20±0.09 | <0.0001 |
| ***unc-47*** | 67±82 | < 0.0001 | 0.25±0.13 | 0.0002 |
| **Tail Stimulation** | **Wild Type** | 366±62 | F(3,35)=49.89, p< 0.0001 | Comparison Reference | 0.58±0.08 | F(3,35)=20.11, p< 0.0001 | Comparison Reference |
| ***unc-25*** | 131±101 | < 0.0001 | 0.30±0.11 | < 0.0001 |
| ***unc-46*** | 171±44 | < 0.0001 | 0.30±0.09 | < 0.0001 |
| ***unc-47*** | 143±32 | < 0.0001 | 0.33±0.06 | < 0.0001 |
| *Translocation speeds are the absolute values regardless of moving directions. | | | | | | | |
